# Supplementary material for: TFR1 expression in induced sputum is associated with asthma severity
Source: PeerJ. 2022 May 17;10:e13474. doi: 10.7717/peerj.13474 (PMC9121881; doi:10.7717/peerj.13474)
Supplement: Supplemental Information 1 [file peerj-10-13474-s002.xlsx]

## Sheet: Sheet1
	TFR1	M1%	BMI	gender	age	history of asthma in young children	allergic rhinitis	history of allergies	family history of allergies	smoking history	ACT	WBC	Neutrophil percentage	Eosinophil percentage
S17	0.61	3.83	21	male	39	no	allergic rhinitis	no	yes	no	25	6.2	43.7	3.4
H66	0.19	2.45	26.3	male	49	no	allergic rhinitis	yes	yes	yes	18	9.1	48	3.6
H58	0.12	0.51	30.1	female	53	yes	allergic rhinitis	yes	yes	no	21	6.27	63.1	3.3
S49	0.63	0.049	24.2	female	26	no	no	yes	yes	no	16	7.7	59.6	4.2
S11	0.78	2.41	17.5	female	55	no	allergic rhinitis	yes	yes	no	18	6	48.4	8.9
H46	0.73	0.53	27.8	female	56	yes	no	yes	yes	no	16
H15	0.96	7.32	35.1	female	58	yes	no	no	yes	no	17	5.88	45	1.8
S5	1.69	4.35	22.6	female	32	yes	no	no	yes	yes	20	7.1	62	4
H13	0.38	2.17	27.9	female	58	no	allergic rhinitis	yes	yes	yes	18	6.7	64.7	6.1
H45	0.17	3.45	26.9	female	48	no	no	no	yes	yes	20	6.6	49.9	1.2
H22	0.2	4.55	27.56	female	52	yes	no	no	yes	no	17	6.26	59.7	11.2
S24	3.28	5.68	19.71	male	52	no	no	no	yes	yes	18	6.26	56.1	2.1
H79	1.14	4.82	29	male	35	no	allergic rhinitis	yes	yes	yes	19	4.7	16.5	7
S74	0.04	1.19	24.1	male	53	no	no	no	yes	yes	10
S85	0.08	1.55	21.4	female	41	yes	allergic rhinitis	yes	yes	no	16	5.24	40.1	5.3
S87	0.03	3.03	22	female	52	yes	no	no	yes	no	14	5.12	51.6	0.6
H90	0.22	7.95	25.6	female	68	yes	no	yes	yes	no	13	5.1	52	2
S16	0.44	3.77	24.1	female	63	no	no	no	no	no	10	3.71	47.4	1.9
H62	6.82	9.83	30.7	male	42	no	allergic rhinitis	no	no	yes	24	9.25	25.5	6.3
S64	2.75	5.46	19.7	male	43	no	no	yes	no	yes	5	10.3	71.8	1.4
H63	1.84	6.84	25.7	female	57	yes	no	no	no	no	25	8.97	71.6	1.4
H68	1.22	14.8	29.6	female	67	no	allergic rhinitis	no	no	no	17	3.99	52.3	2.5
H19	3.06	18.4	28	male	44	no	no	yes	no	yes	25	9.24	60.6	4.8
S56	0.52	1.01	22.5	male	48	no	no	yes	no	no	15	6.02	52.9	3.9
H14	0.26	1.64	25.3	male	53	no	no	no	no	yes	17	7.84	54.4	2.1
S9	4.78	2.05	21.5	male	53	yes	allergic rhinitis	no	no	no	15	6.77	49.6	1
S32	0.92	24.6	20.6	male	33	no	no	no	no	no	13	9.1	76.4	0.2
S8	5.82	8.44	17.7	female	37	no	allergic rhinitis	no	no	no
H10	0.69	2.53	31	female	64	no	no	no	no	no	14	3.49	59.1	1.2
S38	3.34	4.38	21.6	female	36	no	allergic rhinitis	yes	no	no	18	7.3	60.9	2.5
S40	4.16	2.69	21.7	female	40	no	allergic rhinitis	no	no	no	17	6.4	52.8	7.7
S21	0.65	7.09	21.76	male	59	no	allergic rhinitis	no	no	yes	13	7.13	45.8	4.2
S20	0.68	6.58	22.23	male	55	no	no	no	no	yes	14	8.08	60	1.6
S50	0.45	12.7	23.05	female	52	no	no	no	no	no	16	7.4	55.5	4.3
S75	0.63	0.08	21.96	female	33	yes	allergic rhinitis	yes	no	yes	17	6.5	52.8	1.2
S71	0.28	10.6	23.3	male	51	no	no	yes	no	yes	19	9.8	69.4	2.7
S72	0.38	4.92	24.01	female	38	no	no	yes	no	no	13	6.3	45.2	12.2
S70	0.7	4.02	23.5	female	66	no	no	no	no	no	17	5.67	14.1	23.2
S77	0.48	4.1	22.55	male	57	yes	no	no	no	yes	15	6.1	64.6	1.8
S80	3.71	7.59	18.4	female	29	no	no	no	no	no	20	4.9	51.7	6.8
H83	5.91	6.26	29	male	67	no	no	no	no	no	17	7.1	39.6	9.8
S81	1.98	15.8	21.9	female	27	no	allergic rhinitis	yes	no	yes	11	6.95	26.5	21.5
S82	0.5	2.21	22.5	male	62	no	no	no	no	yes	21	2.82	10.6	8.2
S84	0.56	2.61	23.07	female	54	no	allergic rhinitis	yes	no	no	16	4.64	43.9	7.2
H89	0.39	23.7	25.2	female	46	yes	allergic rhinitis	yes	no	no	15	8.4	39.1	6.7
S92	0.76	1.5	27.1	male	48	no	allergic rhinitis	no	no	no	21	5.66	35.1	3.8
H86	1.66	7.19	27	female	43	yes	no	no	no	no	16	7.19	63.5	2.2
S94	1.1	5.98	21.6	male	65	no	no	no	no	yes	17	2.64	62.5	2.6
S95	0.99	2.12	21.6	male	53	no	no	no	no	yes	11	6.27	62	0.4
H96	1	6.21	25.3	female	66	no	allergic rhinitis	yes	no	yes	14	5.47	49.3	4.9
