# Supplementary material for: TFR1 expression in induced sputum is associated with asthma severity
Source: PeerJ journal article supplement (doi:10.7717/peerj.13474), 2022-05-17
Supplement: supplementary_file_1.zip [file supplementary_file_1.zip]

## Sheet: Sheet1
TFR1	IL6
0.44	1.37
0.07	0.82
0.03	0.332
0.61	1.8
0.19	1.94
6.82	14.78
0.03	1.66
2.75	7.69
0.04	0.0696
0.13	1.078
1.22	10.934
3.06	3.19
0.12	7.94
0.52	2.91
0.01	0.7337
0.78	7.48
0.73	7.32
1.69	11.64
4.78	49.8
0.92	1.49
5.82	50.7
0.14	1.59
0.27	2.08
4.16	1.577
0.68	1.961
0.05	3.08
0.45	2.14
0.2	0.507
3.28	29.414
0.2	3.84
0.63	11.5
0.38	12.1
0.7	7.17
0.48	8.34
1.14	11.24
0.15	2.28
0.04	3.18
0.65	3.2
0.08	0.89
3.71	57.24
1.98	9.86
0.5	10.41
5.91	30.11
0.17	6.17
0.39	4.75
1.66	1.5
1.1	0.65
0.99	2.39
1	2.94
0.03	0.16
